# Supplementary material for: Guanine damage by singlet oxygen from SYBR Green I in liquid crystalline DNA
Source: Royal Society of Chemistry journal article supplement (doi:10.1039/d0ob01723j), 2020-01-01
Supplement: d0ob01723j1.pdf [file d0ob01723j1.pdf]

*Supporting Information*

**Guanine damage by singlet oxygen from SYBR Green I  
in liquid crystalline DNA**

Shunsuke Sakurai, Kento Jo, Hikari Kinoshita, Mayu Esumi, Makiko Tanaka\*

*Department of Engineering Science, Graduate School of Informatics and Engineering,  
The University of Electro-Communications, 1-5-1 Chofugaoka, Chofu, Tokyo 182-8585  
Japan*

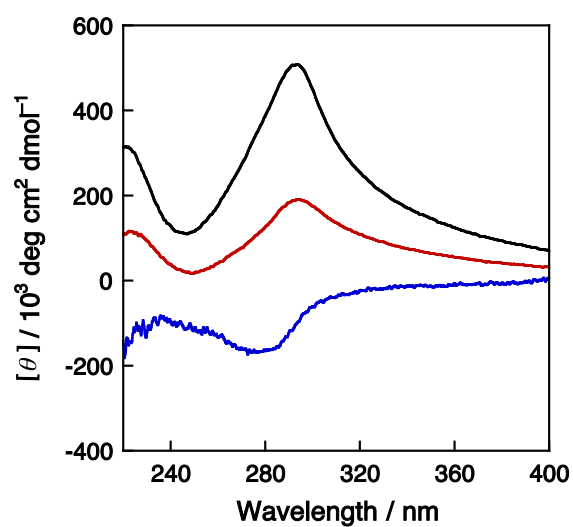

**Fig. S1** CD spectra of G2 (blue line), G13 (red line), and G22 (black line) in 40 wt % PEG solution. No peak was observed above 400 nm. Experimental conditions: [DNA] = 4.0  $\mu\text{M}$  and [NaCl] = 100 mM in pH 7.5 Tris-HCl buffer (50 mM).

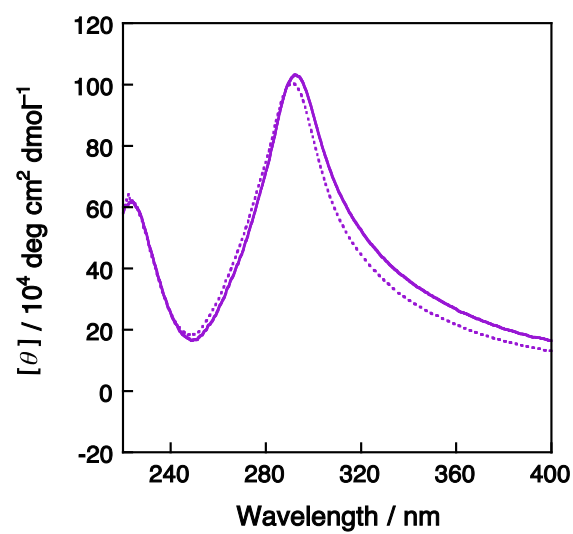

**Fig. S2** CD spectra of G13 in the absence (purple solid line) and presence of 0.18% DMSO (purple dotted line) in 40 wt % PEG solution. Experimental conditions: [DNA] = 4.0  $\mu$ M and [NaCl] = 100 mM in pH 7.5 Tris-HCl buffer (50 mM).

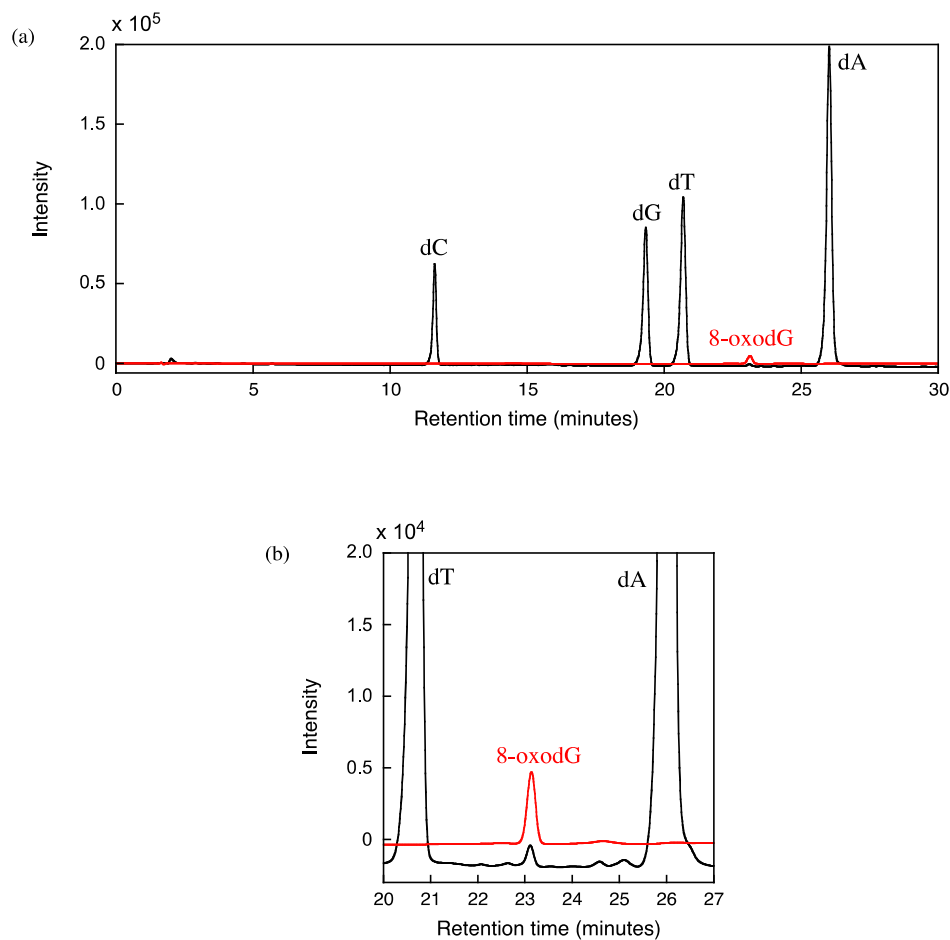

Fig. S3 (a) Overlaid HPLC chromatograms ( $\lambda_{\text{detection}} = 254 \text{ nm}$ ) of the digested G13-DNA obtained after 30-min irradiation (black line) and 8-oxo-7,8-dihydro-2'-deoxyguanosine (8-oxodG, 120 pmol) (red line). (b) Expansion of HPLC profiles in the region of 20-27 min. Irradiation conditions:  $[\text{DNA}] = 4.0 \mu\text{M}$ ,  $[\text{SG}] = 10 \mu\text{M}$ , and  $[\text{NaCl}] = 100 \text{ mM}$  in 50 mM Tris-HCl (pH 7.5) containing 40 wt % PEG 1540 solution. HPLC Gradient: 0-7 % over 27 min.

5'-TTT CAA TTT ATT CAC TAA **PyU**AA AAA **GA** ACA TCT TTC TTA ATA -3'  
3'-AAA ITT AAA TAA ITI ATT ATT TTT CCT TIT AIA AAI AAT TAT -5'

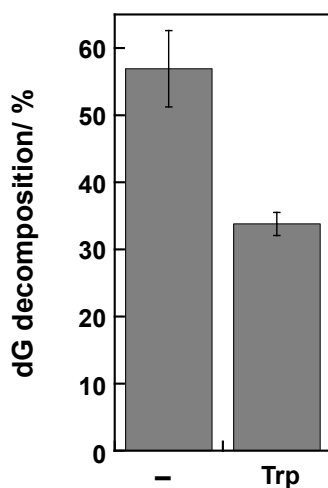

**Fig. S4** dG decomposition percentages of the pyrene-modified oligonucleotides (4.0  $\mu\text{M}$ ) in the absence and presence of tryptophan (Trp, 1.0 mM). The sequence is shown above. 5-(pyrenylethynyl)-2'-deoxyuridine ( $\text{PyU}$ ) was used as a photooxidant in oligonucleotides ( $\lambda_{\text{ex}} > 350 \text{ nm}$ , 10 min). The dsDNA was condensed as liquid crystalline phase in 40 wt% PEG 1540 solution containing 100 mM NaCl.
